# Supplementary material for: Advances in genome-wide RNAi cellular screens: a case study using the Drosophila JAK/STAT pathway
Source: PubMed Central journal article supplement (PMC3526451; doi:10.1186/1471-2164-13-506), 2012-09-24
Supplement: 1471-2164-13-506-S6.pdf [file 1471-2164-13-506-S6.pdf]

**Additional File 6**

| <b>Row</b> | <b>Gene</b>    | <b>SRSF genome</b> | <b>SRSF secondary</b> | <b>Baeg genome (direction and fold change)</b> |
|------------|----------------|--------------------|-----------------------|------------------------------------------------|
| 1          | <i>dome</i>    | <b>-7.9</b>        | <b>-7.1</b>           | - >10                                          |
| 2          | <i>Stat92E</i> | <b>-6.8</b>        | <b>-11.4</b>          | - >10                                          |
| 3          | <i>hop</i>     | <b>-5.7</b>        | <b>-10</b>            | - >10                                          |
| 7          | <i>Ptp61F</i>  | <b>2.3</b>         | <b>3.6</b>            | + >2.5                                         |
| 13         | <i>Socs36E</i> | <b>2.8</b>         | 1.8 #                 | + >3                                           |
| 26         | <i>lola</i>    | <b>3.1</b>         | <b>4</b>              | + >3                                           |

**Key:**

**grey and bold** = Z-score <-2 or >2

**blue and #** = Z-score <-1.7 or >1.7
