# Supplementary material for: Advances in genome-wide RNAi cellular screens: a case study using the Drosophila JAK/STAT pathway
Source: Springer Nature journal article supplement (doi:10.1186/1471-2164-13-506), 2012-09-24
Supplement: 12864_2012_4476_MOESM1_ESM.pdf [file 12864_2012_4476_MOESM1_ESM.pdf]

# Additional File 1

A

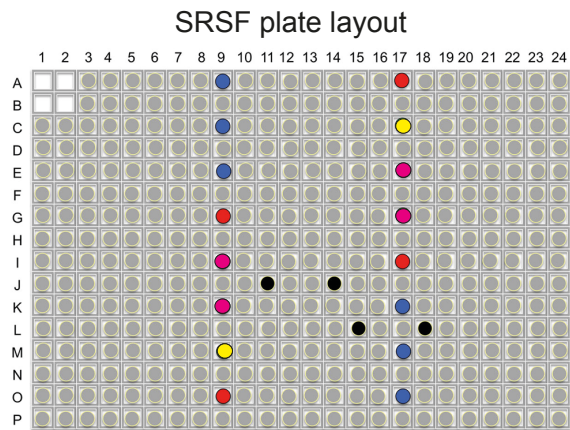

B

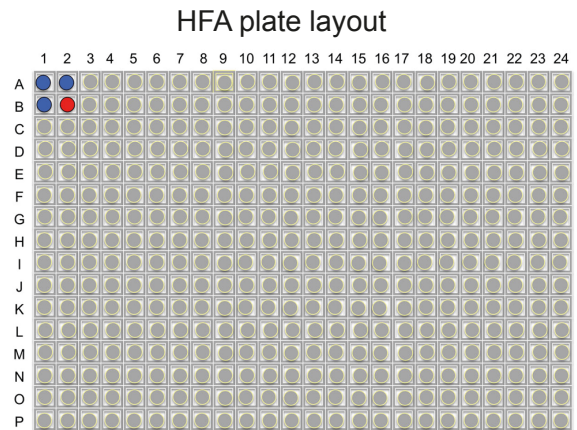

- KEY:
- dsRNA
  - barcode (e.g. DIAP1)
  - non-interacting controls (e.g. ZK686.3)
  - technical control (e.g. RLuc)
  - positive pathway regulator (e.g. Dome)
  - negative pathway regulator (e.g. Socs36E)
