# Supplementary material for: Advances in genome-wide RNAi cellular screens: a case study using the Drosophila JAK/STAT pathway
Source: Springer Nature journal article supplement (doi:10.1186/1471-2164-13-506), 2012-09-24

# Additional File 2

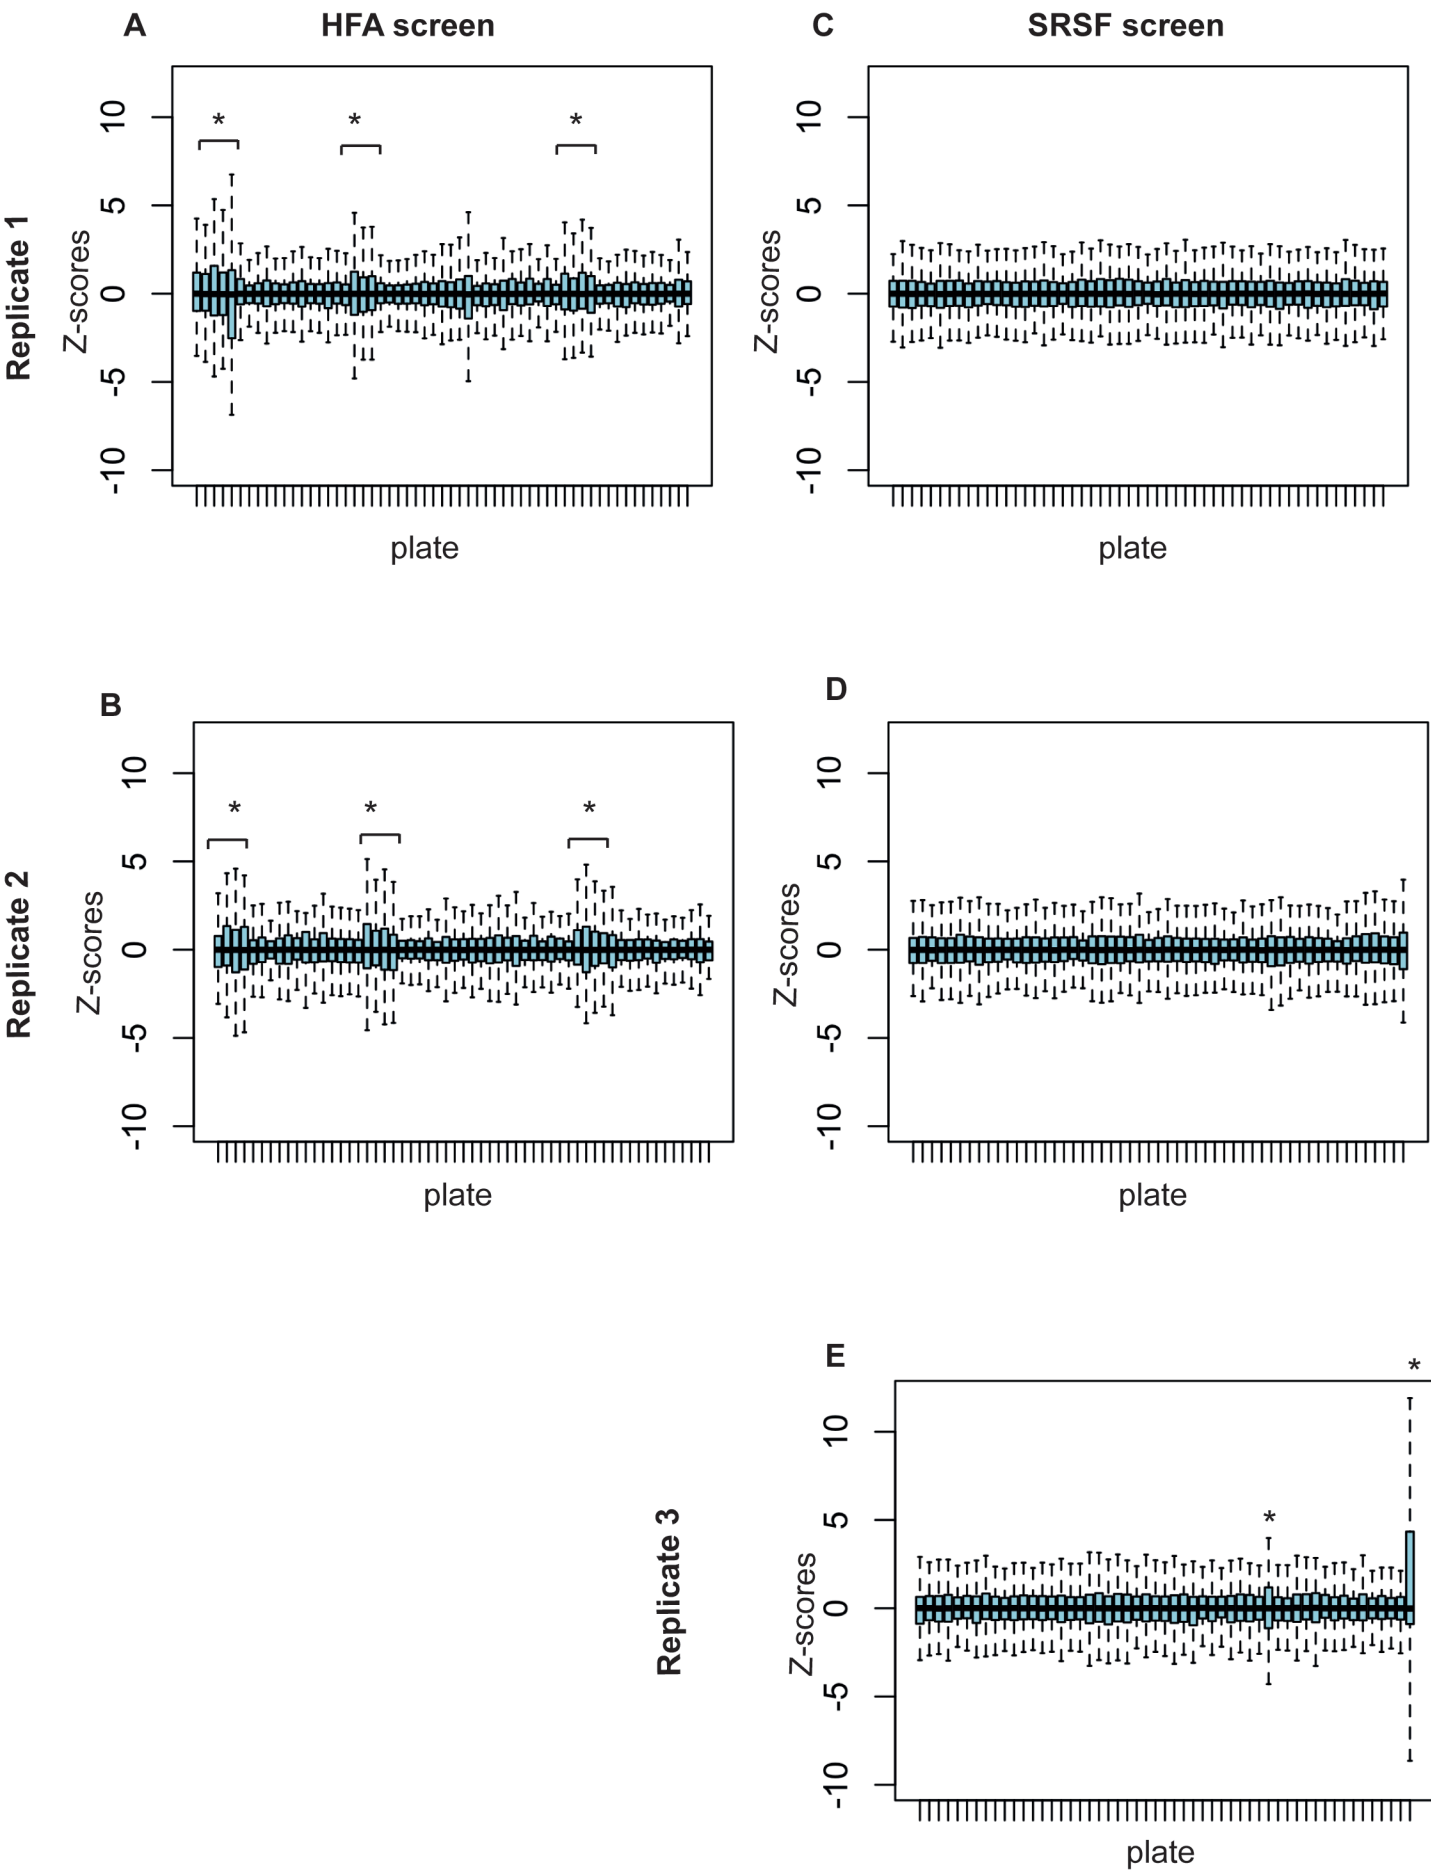

Supplement: 12864_2012_4476_MOESM2_ESM.pdf [file 12864_2012_4476_MOESM2_ESM.pdf]
