# Supplementary material for: Advances in genome-wide RNAi cellular screens: a case study using the Drosophila JAK/STAT pathway
Source: Springer Nature journal article supplement (doi:10.1186/1471-2164-13-506), 2012-09-24
Supplement: 12864_2012_4476_MOESM3_ESM.pdf [file 12864_2012_4476_MOESM3_ESM.pdf]

## Additional File 3

| SYMBOL         | GO_BIOLOGICAL_PROCESS                                                | BKN      | FL_Zscore | RL_Zscore | FL/RL_Zscore |
|----------------|----------------------------------------------------------------------|----------|-----------|-----------|--------------|
| Hsp70Bb        | heat shock-mediated polytene chromosome puffing ; response           | BKN40659 | -1.7      | 25.6      | -14.7        |
| Hsp70Aa        | heat shock-mediated polytene chromosome puffing ; response           | BKN40468 | -1.2      | 25.5      | -14.1        |
| Hsp70Bbb       | heat shock-mediated polytene chromosome puffing ; response           | BKN42219 | -1.3      | 23.5      | -13.3        |
| Hsp70Bc        | heat shock-mediated polytene chromosome puffing ; response           | BKN41955 | -0.6      | 20.9      | -11.3        |
| Hsc70-2        | protein folding ; response to heat ; protein folding                 | BKN45569 | -1.0      | 18.6      | -10.4        |
| Tim17b1        | protein transport ; protein targeting to mitochondrion               | BKN32748 | 0.4       | 17.1      | -8.2         |
| CG5800         | larval somatic muscle development ; neurogenesis                     | BKN22766 | 0.0       | 16.1      | -8.1         |
| Hsc70-2        | protein folding ; response to heat ; protein folding                 | BKN29772 | -1.2      | 15.7      | -9.0         |
| Dhpr           | metabolic process                                                    | BKN28477 | -0.3      | 14.8      | -7.9         |
| yellow-g       | biological_process                                                   | BKN29964 | -1.3      | 14.7      | -8.7         |
| CG3328         | regulation of transcription, DNA-dependent                           | BKN27762 | 0.1       | 14.5      | -7.1         |
| CG11370        | -                                                                    | BKN29963 | -0.2      | 14.2      | -7.4         |
| Hsc70-1        | protein folding ; response to heat ; protein folding                 | BKN31450 | -0.8      | 14.1      | -7.7         |
| Or59b          | sensory perception of smell ; sensory perception of smell            | BKN30129 | -0.5      | 14.0      | -7.6         |
| Hsp83          | spermatogenesis ; centrosome cycle ; protein folding ; R7 cell       | BKN21307 | -1.5      | 13.6      | -8.4         |
| Prosalpha5     | ubiquitin-dependent protein catabolic process ; cellular process     | BKN28214 | 0.5       | 13.0      | -6.3         |
| sec10          | neurotransmitter secretion ; synaptic vesicle docking involved i     | BKN20533 | -0.2      | 12.4      | -6.4         |
| mats           | signal transduction ; cell proliferation ; apoptotic process         | BKN20236 | 0.5       | 12.4      | -5.6         |
| Mtr3           | regulation of gene expression                                        | BKN45761 | -0.8      | 11.9      | -6.8         |
| CG16890        | -                                                                    | BKN28865 | 0.9       | 11.0      | -4.8         |
| CG30156        | neurogenesis ; protein folding                                       | BKN45189 | -1.0      | 11.0      | -6.5         |
| Pros26         | ubiquitin-dependent protein catabolic process ; proteolysis ; pn     | BKN22072 | -0.3      | 10.5      | -5.6         |
| Hsp70Ba        | heat shock-mediated polytene chromosome puffing ; response           | BKN41583 | 0.3       | 10.3      | -4.9         |
| Prosbeta5      | centrosome organization ; mitotic spindle organization ; mitotic     | BKN45135 | 0.1       | 10.2      | -5.2         |
| Dscam4         | cell adhesion                                                        | BKN42505 | 0.5       | 9.0       | -3.9         |
| CG34423        | negative regulation of nucleotide metabolic process                  | BKN40085 | 0.6       | 8.8       | -3.7         |
| CG7384         | -                                                                    | BKN24987 | 0.6       | 8.8       | -3.8         |
| CG9130         | -                                                                    | BKN40033 | 0.4       | 8.7       | -3.5         |
| DnaJ-1         | response to heat ; response to heat ;protein folding                 | BKN45366 | -1.1      | 8.6       | -5.4         |
| Obp49a         | sensory perception of chemical stimulus                              | BKN25372 | -0.5      | 8.4       | -4.7         |
| IntS6          | -                                                                    | BKN45482 | -0.6      | 8.4       | -4.8         |
| Rep            | intracellular protein transport ; neurotransmitter secretion ; ve;   | BKN21378 | -0.6      | 8.1       | -4.7         |
| Prosbeta3      | proteolysis ; response to DNA damage stimulus ; neurogenesis         | BKN28041 | 0.1       | 7.9       | -3.9         |
| Rpt1           | proteolysis ; cellular process ; response to DNA damage stimuli      | BKN20388 | 0.5       | 7.7       | -3.6         |
| Nuf2           | mitotic metaphase plate congression ; chromosome segregation         | BKN27199 | 0.2       | 7.4       | -3.5         |
| tRNA:CR31130   | translation                                                          | BKN40453 | 1.4       | 7.4       | -1.6         |
| Prosbeta5      | centrosome organization ; mitotic spindle organization ; mitotic     | BKN21455 | -0.3      | 7.4       | -4.1         |
| CG3906         | -                                                                    | BKN25623 | -0.4      | 7.3       | -4.0         |
| CG32425        | -                                                                    | BKN40467 | 0.3       | 7.2       | -3.4         |
| CG14870        | cilium assembly                                                      | BKN29337 | 0.1       | 7.2       | -3.4         |
| Fas3           | axon guidance ; synaptic target recognition ; ovarian follicle cell  | BKN23309 | -0.2      | 7.1       | -3.6         |
| DnaJ-1         | response to heat ; response to heat ; protein folding                | BKN31167 | 0.1       | 6.9       | -3.2         |
| Hsc70Cb        | protein folding                                                      | BKN20891 | 0.6       | 6.7       | -2.6         |
| RpL13A         | translation ; translation ; Notch signaling pathway ; chaeta mo      | BKN40429 | 0.2       | 6.7       | -2.4         |
| CG8543         | -                                                                    | BKN33113 | 1.9       | 6.7       | -0.8         |
| CG13297        | -                                                                    | BKN33121 | 1.1       | 6.6       | -1.5         |
| Obp47a         | sensory perception of chemical stimulus ; sensory perception o       | BKN31646 | 0.7       | 6.6       | -2.5         |
| dro2           | defense response ; defense response to fungus                        | BKN42373 | 1.3       | 6.6       | -1.2         |
| CG8547         | -                                                                    | BKN46009 | 0.3       | 6.5       | -2.8         |
| mamo           | female meiosis ; sperm chromatid decondensation ; gamete ge          | BKN33149 | 1.3       | 6.4       | -1.4         |
| mit(1)15       | mitotic sister chromatid segregation ; meiotic anaphase I ; mit      | BKN20532 | 0.6       | 6.4       | -2.6         |
| snoRNA:Me285-1 | -                                                                    | BKN40401 | 1.1       | 6.3       | -1.3         |
| snRNA:U1:95Cb  | nuclear mRNA splicing, via spliceosome                               | BKN40449 | 1.9       | 6.2       | -0.5         |
| CG33494        | -                                                                    | BKN33101 | 1.3       | 6.2       | -1.0         |
| Brd8           | negative regulation of gene expression                               | BKN27830 | 1.3       | 6.2       | -1.8         |
| CG17202        | signal transduction                                                  | BKN29787 | 0.1       | 6.1       | -2.9         |
| CG15478        | -                                                                    | BKN33133 | 0.2       | 6.1       | -2.2         |
| Rpn1           | proteolysis ; mitotic spindle organization ; mitotic spindle elong   | BKN22968 | -0.5      | 6.1       | -3.6         |
| snRNA:U5:23D   | nuclear mRNA splicing, via spliceosome                               | BKN42345 | 1.3       | 6.0       | -0.9         |
| CG15649        | -                                                                    | BKN33097 | 0.7       | 6.0       | -1.5         |
| Prosbeta7      | cell proliferation ; mitotic spindle elongation ; mitotic spindle or | BKN28365 | -0.6      | 5.9       | -3.6         |
| Pros26.4       | proteolysis ; ubiquitin-dependent protein catabolic process ; cell   | BKN21532 | -0.4      | 5.8       | -3.5         |
| CG6154         | proteolysis                                                          | BKN27428 | -0.5      | 5.8       | -3.4         |
| CG40040        | -                                                                    | BKN40045 | 0.6       | 5.7       | -1.5         |
| TwdIU          | chitin-based cuticle development ; body morphogenesis                | BKN30817 | 1.2       | 5.7       | -1.0         |
| san            | mitotic sister chromatid cohesion ; mitosis ; lateral inhibition     | BKN46596 | 0.7       | 5.7       | -2.4         |
| CG18823        | -                                                                    | BKN42325 | 1.3       | 5.7       | -0.8         |
| CG41427        | -                                                                    | BKN42705 | 1.5       | 5.7       | -0.7         |
| CG9517         | oxidation-reduction process ; alcohol metabolic process              | BKN30833 | 0.9       | 5.6       | -1.3         |
| gfzf           | neurogenesis ; mitotic cell cycle G2/M transition DNA damage c       | BKN33145 | 0.2       | 5.6       | -2.1         |
| CG33307        | biological_proces                                                    | BKN30797 | 0.8       | 5.6       | -1.3         |
| CR41583        | -                                                                    | BKN42729 | 1.5       | 5.6       | -0.6         |
| betaTub85D     | microtubule-based process ; salivary gland morphogenesis ; m         | BKN30793 | 1.9       | 5.6       | -0.2         |
| lmd            | regulation of transcription, DNA-dependent ; somatic muscle de       | BKN27849 | 0.7       | 5.5       | -2.0         |
| CG30283        | proteolysis                                                          | BKN33073 | 0.9       | 5.5       | -1.1         |
| And            | detection of calcium ion                                             | BKN32753 | 1.5       | 5.3       | -0.5         |
| tRNA:L:35C     | translation                                                          | BKN42765 | 1.9       | 5.3       | -0.2         |
| CG11866        | -                                                                    | BKN33109 | 1.3       | 5.3       | -0.7         |
| Hsp68          | determination of adult lifespan ; response to heat ; response to     | BKN25780 | -0.2      | 5.3       | -2.8         |
| Cpr67Fb        | -                                                                    | BKN29517 | 0.8       | 5.3       | -1.7         |
| CG34193        | -                                                                    | BKN42361 | 1.6       | 5.3       | -0.3         |
| CG7039         | small GTPase mediated signal transduction                            | BKN28403 | -0.6      | 5.1       | -3.3         |
| Tbp-1          | proteolysis ; cellular process ; protein catabolic process           | BKN21879 | 0.1       | 5.1       | -2.6         |
| Rpt4           | proteolysis ; neurogenesis ; protein catabolic process               | BKN29219 | -0.5      | 5.0       | -3.1         |
| CG7377         | -                                                                    | BKN42709 | 1.5       | 5.0       | -0.2         |

 = Z-score <-2  
 = Z-score >2
