# Supplementary material for: Advances in genome-wide RNAi cellular screens: a case study using the Drosophila JAK/STAT pathway
Source: Springer Nature journal article supplement (doi:10.1186/1471-2164-13-506), 2012-09-24
Supplement: 12864_2012_4476_MOESM4_ESM.pdf [file 12864_2012_4476_MOESM4_ESM.pdf]

## Additional File 4

| <b>Gene</b>       | <b>BKN</b> | <b>HFA</b> | <b>Flybase ID</b> |
|-------------------|------------|------------|-------------------|
| <i>dome</i>       | BKN25660   | HFA19583   | FBgn0043903       |
| <i>Stat92E</i>    | BKN20615   | HFA16870   | FBgn0016917       |
| <i>hop</i>        | BKN24272   | HFA20340   | FBgn0004864       |
| <i>Tbp</i>        | BKN20836   | HFA04662   | FBgn0003687       |
| <i>mask</i>       | BKN20625   | HFA15370   | FBgn0043884       |
| <i>TfIIA-L</i>    | BKN28669   | HFA16882   | FBgn0011289       |
| <i>CG40121</i>    | BKN41059   | HFA18531   | FBgn0058121       |
| <i>dom</i>        | BKN21379   | HFA04558   | FBgn0020306       |
| <i>Mov34</i>      | BKN21370   | HFA04624   | FBgn0002787       |
| <i>E2f</i>        | BKN20400   | HFA16655   | FBgn0011766       |
| <i>CG32269</i>    | BKN40155   | HFA08195   | FBgn0052269       |
| <i>RpL24</i>      | BKN28312   | HFA03185   | FBgn0032518       |
| <i>ctrip</i>      | BKN20611   | HFA12242   | FBgn0260794       |
| <i>RpLP2</i>      | BKN27368   | HFA07539   | FBgn0003274       |
| <i>Chd1</i>       | BKN21926   | HFA00745   | FBgn0250786       |
| <i>Dp</i>         | BKN29434   | HFA07402   | FBgn0011763       |
| <i>Rpl1215</i>    | BKN20898   | HFA20280   | FBgn0003277       |
| <i>Dcp2</i>       | BKN21841   | HFA10597   | FBgn0036534       |
| <i>CG9723</i>     | BKN21228   | HFA20206   | FBgn0030768       |
| <i>pncr017:3R</i> | BKN31481   | HFA14080   | FBgn0046756       |
| <i>Cnot4</i>      | BKN22063   | HFA02830   | FBgn0051716       |
| <i>CG11873</i>    | BKN26700   | HFA00063   | FBgn0039633       |
| <i>qkr54B</i>     | BKN27961   | HFA07670   | FBgn0022987       |
| <i>kis</i>        | BKN20986   | HFA00823   | FBgn0086902       |
| <i>shrb</i>       | BKN28557   | HFA07061   | FBgn0086656       |
| <i>ftz-f1</i>     | BKN28995   | HFA12996   | FBgn0001078       |
| <i>TSG101</i>     | BKN28961   | HFA11098   | FBgn0036666       |
| <i>Ptp61F</i>     | BKN21934   | HFA08683   | FBgn0003138       |
| <i>Saf-B</i>      | BKN20574   | HFA16167   | FBgn0039229       |
| <i>l(3)mbt</i>    | BKN20908   | HFA16983   | FBgn0002441       |
| <i>CG7185</i>     | BKN28487   | HFA10781   | FBgn0035872       |
| <i>Sin</i>        | BKN22002   | HFA11880   | FBgn0028402       |
| <i>Hsp60B</i>     | BKN30688   | HFA00542   | FBgn0011244       |
| <i>CG11399</i>    | BKN21417   | HFA19621   | FBgn0037021       |
| <i>Socs36E</i>    | BKN45944   | HFA02455   | FBgn0041184       |
| <i>lola</i>       | BKN30256   | HFA06741   | FBgn0005630       |
| <i>Surf4</i>      | BKN22052   | HFA16875   | FBgn0019925       |
| <i>Cklalpha</i>   | BKN27574   | HFA20231   | FBgn0015024       |
| <i>ham</i>        | BKN22290   | HFA02070   | FBgn0045852       |
| <i>zfh1</i>       | BKN29931   | HFA17098   | FBgn0004606       |
| <i>chinmo</i>     | BKN45751   | HFA00509   | FBgn0086758       |
| <i>srp</i>        | BKN45799   | HFA18886   | FBgn0003507       |
