# Supplementary material for: Advances in genome-wide RNAi cellular screens: a case study using the Drosophila JAK/STAT pathway
Source: Springer Nature journal article supplement (doi:10.1186/1471-2164-13-506), 2012-09-24
Supplement: 12864_2012_4476_MOESM10_ESM.pdf [file 12864_2012_4476_MOESM10_ESM.pdf]

Table 2

| Row | Gene              | SRSF genome | SRSF secondary | HFA genome      | Tertiary Screen (independent dsRNAs) |
|-----|-------------------|-------------|----------------|-----------------|--------------------------------------|
| 1   | <i>dome</i>       | -7.9        | -7.1           | -8.0            | -6.7                                 |
| 2   | <i>Stat92E</i>    | -6.8        | -11.4          | -6.5            | -6.8                                 |
| 3   | <i>hop</i>        | -5.7        | -10.0          | -2.6            | -4.4                                 |
| 4   | <i>mask</i>       | -4.3        | -6.6           | -3.8            | NS                                   |
| 5   | <i>Mov34</i>      | -3.2        | -4.1           | -3.0            | 0.1                                  |
| 6   | <i>RpL24</i>      | -2.6        | -2.5           | -6.8            | 0.1                                  |
| 7   | <i>Ptp61F</i>     | 2.3         | 3.6            | 5.0             | 4.1                                  |
| 8   | <i>CkIalpha</i>   | 4.1         | 2.6            | 4.8             | 2.5                                  |
| 9   | <i>chinmo</i>     | 6.6         | 4.8            | 7.0             | 2.7                                  |
| 10  | <i>TfIIA-L</i>    | -3.8        | -5.5           | -1.8            | NS                                   |
| 11  | <i>Chd1</i>       | -2.2        | -1.7           | -2.4            | NS                                   |
| 12  | <i>Saf-B</i>      | 2.5         | 1.8            | 4.6             | NS                                   |
| 13  | <i>Socs36E</i>    | 2.8         | 1.8            | 2.5             | 3.9                                  |
| 14  | <i>shrb</i>       | 2.3         | 3.0            | NA <sup>1</sup> | -0.4                                 |
| 15  | <i>dom</i>        | -3.4        | -2.4           | NA <sup>2</sup> | 0.9                                  |
| 16  | <i>RpLP2</i>      | -2.4        | -2.2           | NA <sup>2</sup> | -0.5                                 |
| 17  | <i>CG7185</i>     | 2.6         | 1.7            | NA <sup>3</sup> | 1.6                                  |
| 18  | <i>RpII215</i>    | -2.2        | -2.2           | NA <sup>3</sup> | -1.1                                 |
| 19  | <i>Dp</i>         | -2.2        | -2.8           | -2.8 *          | -0.8                                 |
| 20  | <i>CG32269</i>    | -3.1        | -1.7           | -1.7 *          | 0.2                                  |
| 21  | <i>E2f</i>        | -3.1        | -4.9           | -1.0            | -1.3                                 |
| 22  | <i>CG11873</i>    | 2.2         | 2.2            | 0.0             | 2.5                                  |
| 23  | <i>TSG101</i>     | 2.3         | 6.0            | 1.6             | -1.1                                 |
| 24  | <i>ftz-f1</i>     | 2.3         | 2.7            | 0.5             | 2.0                                  |
| 25  | <i>kis</i>        | 2.3         | 2.5            | 0.9             | 0.0                                  |
| 26  | <i>lola</i>       | 3.1         | 4.0            | -0.8            | -1.1                                 |
| 27  | <i>srp</i>        | 8.6         | 8.5            | -0.5            | NS                                   |
| 28  | <i>ctrip</i>      | -2.6        | -1.9           | 0.0             | -1.1                                 |
| 29  | <i>ham</i>        | 4.5         | 1.8            | -0.5            | 1.7                                  |
| 30  | <i>Tbp</i>        | -4.5        | 0.5            | -1.3            | -2.0                                 |
| 31  | <i>CG40121</i>    | -3.6        | -1.1           | 1.4             | -3.3                                 |
| 32  | <i>Dcp2</i>       | -2.0        | -0.6           | -0.6            | -0.4                                 |
| 33  | <i>CG9723</i>     | -2.0        | 1.3            | -0.5            | 0.0                                  |
| 34  | <i>pncr017:3R</i> | -2.0        | -0.4           | 1.2             | -0.4                                 |
| 35  | <i>Cnot4</i>      | 2.1         | 0.7            | 0.5             | 0.4                                  |
| 36  | <i>qkr54B</i>     | 2.2         | 0.4            | 0.3             | 0.7                                  |
| 37  | <i>l(3)mbt</i>    | 2.6         | 0.5            | -0.4            | 0.8                                  |
| 38  | <i>Hsp60B</i>     | 2.7         | 0.1            | 0.0             | 0.0                                  |
| 39  | <i>Sin</i>        | 2.7         | 1.2            | 1.5             | -0.1                                 |
| 40  | <i>CG11399</i>    | 2.8         | 1.4            | 0.3             | 0.2                                  |
| 41  | <i>Surf4</i>      | 3.1         | 0.8            | 1.3             | -0.7                                 |
| 42  | <i>zfh1</i>       | 5.2         | 0.8            | 0.6             | 0.6                                  |

 = Zscore <-2 or >2

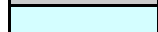 = Zscore <-1.7 or >1.7

\* = only one replicate significant

NA<sup>1</sup> = Excluded due to edge effects

NA<sup>2</sup> = Excluded due to liquid handling error

NA<sup>3</sup> = One replicate excluded due to liquid handling error

NS = Not screened since previous clones are already independent designs
