# Supplementary material for: Advances in genome-wide RNAi cellular screens: a case study using the Drosophila JAK/STAT pathway
Source: Springer Nature journal article supplement (doi:10.1186/1471-2164-13-506), 2012-09-24
Supplement: 12864_2012_4476_MOESM12_ESM.pdf [file 12864_2012_4476_MOESM12_ESM.pdf]

Table 3

| On target         |                  |                   | Predicted Off target    |                   |                    |                    |
|-------------------|------------------|-------------------|-------------------------|-------------------|--------------------|--------------------|
| On target - dsRNA | On target - Gene | On target - score | Off target - flybase ID | Off target - gene | Off target - dsRNA | Off target - score |
| HFA16984          | <b>larp</b>      | -3.1              | FBgn0003013             | <b>osa</b>        | HFA17022           | -4.2               |
| HFA18710          | <b>RpS14a</b>    | -6.1              | FBgn0004404             | <b>RpS14b</b>     | HFA18711           | -4.9               |
| HFA19901          | <b>CG4411</b>    | -2.3              | FBgn0039633             | <b>CG11873</b>    | BKN26700           | 2.2                |
|                   |                  |                   | FBgn0028991             | <b>CG4055</b>     | HFA06863           | -3.7               |
|                   |                  |                   | FBgn0043884             | <b>mask</b>       | HFA16018           | -5.6               |
|                   |                  |                   | FBgn0043884             | <b>mask</b>       | HFA16005           | -5.8               |
|                   |                  |                   | FBgn0043884             | <b>mask</b>       | BKN20625           | -4.3               |
|                   |                  |                   | FBgn0004656             | <b>fs(1)h</b>     | HFA18778           | -4.1               |
|                   |                  |                   | FBgn0086902             | <b>kis</b>        | BKN20986           | 2.3                |
|                   |                  |                   | FBgn0004864             | <b>hop</b>        | HFA20340           | -5.8               |
|                   |                  |                   | FBgn0004864             | <b>hop</b>        | BKN24272           | -5.7               |
| HFA12365          | <b>Rm62</b>      | 3.1               | FBgn0035720             | <b>CG10077</b>    | HFA09691           | 3.1                |
| HFA07091          | <b>CG8179</b>    | 4.9               | FBgn0020306             | <b>dom</b>        | BKN21379           | -3.4               |
|                   |                  |                   | FBgn0015618             | <b>Cdk8</b>       | HFA11113           | -2.3               |
|                   |                  |                   | FBgn0015903             | <b>apt</b>        | HFA04671           | 3.2                |
|                   |                  |                   | FBgn0026575             | <b>CG4411</b>     | HFA19901           | -2.1               |
|                   |                  |                   | FBgn0260794             | <b>ctrip</b>      | BKN20611           | -2.6               |
|                   |                  |                   | FBgn0028991             | <b>CG4055</b>     | HFA06863           | -3.7               |
|                   |                  |                   | FBgn0039633             | <b>CG11873</b>    | BKN26700           | 2.2                |
|                   |                  |                   | FBgn0000008             | <b>CG14169</b>    | HFA10170           | -2.2               |
|                   |                  |                   | FBgn0003013             | <b>osa</b>        | HFA17022           | -4.2               |
|                   |                  |                   | FBgn0051716             | <b>Cnot4</b>      | BKN22063           | 2.1                |
|                   |                  |                   | FBgn0260724             | <b>larp</b>       | HFA16984           | -2.9               |
|                   |                  |                   | FBgn0035720             | <b>CG10077</b>    | HFA09691           | 3.1                |
|                   |                  |                   | FBgn0011666             | <b>msi</b>        | HFA17003           | -2.6               |
|                   |                  |                   | FBgn0003507             | <b>srp</b>        | HFA17068           | 13.6               |
|                   |                  |                   | FBgn0003507             | <b>srp</b>        | BKN45799           | 8.6                |
|                   |                  |                   | FBgn0004656             | <b>fs(1)h</b>     | HFA18778           | -4.1               |
|                   |                  |                   | FBgn0003687             | <b>Tbp</b>        | BKN20836           | -4.5               |
|                   |                  |                   | FBgn0012049             | <b>msi</b>        | HFA17003           | -2.6               |
|                   |                  |                   | FBgn0004606             | <b>zfh1</b>       | BKN29931           | 5.2                |
|                   |                  |                   | FBgn0001078             | <b>ftz-f1</b>     | BKN28995           | 2.3                |
|                   |                  |                   | FBgn0086902             | <b>kis</b>        | BKN20986           | 2.3                |
|                   |                  |                   | FBgn0034258             | <b>CG4954</b>     | HFA06905           | -5.5               |
|                   |                  |                   | FBgn0027492             | <b>CkIibeta</b>   | HFA20230           | -2.2               |
|                   |                  |                   | FBgn0032633             | <b>CG4055</b>     | HFA06863           | -3.7               |
|                   |                  |                   | FBgn0043884             | <b>mask</b>       | HFA16018           | -5.6               |
|                   |                  |                   | FBgn0043884             | <b>CG6268</b>     | HFA16005           | -5.8               |
|                   |                  |                   | FBgn0043884             | <b>mask</b>       | BKN20625           | -4.3               |
| HFA06863          | <b>CG4055</b>    | -4.2              | FBgn0015618             | <b>Cdk8</b>       | HFA11113           | -2.3               |
|                   |                  |                   | FBgn0000008             | <b>CG14169</b>    | HFA10170           | -2.2               |
|                   |                  |                   | FBgn0003507             | <b>srp</b>        | HFA17068           | 13.6               |
|                   |                  |                   | FBgn0003507             | <b>srp</b>        | BKN45799           | 8.6                |
|                   |                  |                   | FBgn0039633             | <b>CG11873</b>    | BKN26700           | 2.2                |
|                   |                  |                   | FBgn0001078             | <b>ftz-f1</b>     | BKN28995           | 2.3                |
|                   |                  |                   | FBgn0086902             | <b>kis</b>        | BKN20986           | 2.3                |
| HFA04671          | <b>apt</b>       | 2.7               | FBgn0001078             | <b>ftz-f1</b>     | BKN28995           | 2.3                |
|                   |                  |                   | FBgn0030636             | <b>cngl</b>       | HFA19089           | -2.7               |
|                   |                  |                   | FBgn0003507             | <b>srp</b>        | HFA17068           | 13.6               |
|                   |                  |                   | FBgn0003507             | <b>srp</b>        | BKN45799           | 8.6                |
| HFA18711          | <b>RpS14b</b>    | -6.0              | FBgn0004403             | <b>RpS14a</b>     | HFA18710           | -4.9               |
| HFA17068          | <b>srp</b>       | 8.5               | FBgn0030636             | <b>cngl</b>       | HFA19089           | -2.7               |
|                   |                  |                   | FBgn0020306             | <b>dom</b>        | BKN21379           | -3.4               |
|                   |                  |                   | FBgn0015618             | <b>Cdk8</b>       | HFA11113           | -2.3               |
|                   |                  |                   | FBgn0039633             | <b>CG11873</b>    | BKN26700           | 2.2                |
|                   |                  |                   | FBgn0260794             | <b>ctrip</b>      | BKN20611           | -2.6               |
|                   |                  |                   | FBgn0003016             | <b>kis</b>        | BKN20986           | 2.3                |
|                   |                  |                   | FBgn0086758             | <b>CG17156</b>    | HFA00485           | 7.0                |
|                   |                  |                   | FBgn0086758             | <b>CG17649</b>    | HFA00509           | 7.0                |
|                   |                  |                   | FBgn0086758             | <b>chinmo</b>     | BKN45751           | 6.6                |
|                   |                  |                   | FBgn0005630             | <b>lola</b>       | BKN30256           | 3.1                |
|                   |                  |                   | FBgn0000259             | <b>CkIibeta</b>   | HFA20230           | -2.2               |
|                   |                  |                   | FBgn0028371             | <b>CG13525</b>    | HFA04167           | -2.9               |
|                   |                  |                   | FBgn0032633             | <b>CG4055</b>     | HFA06863           | -3.7               |
|                   |                  |                   | FBgn0015903             | <b>apt</b>        | HFA04671           | 3.2                |
|                   |                  |                   | FBgn0026575             | <b>CG4411</b>     | HFA19901           | -2.1               |
|                   |                  |                   | FBgn0001078             | <b>ftz-f1</b>     | BKN28995           | 2.3                |
|                   |                  |                   | FBgn0011666             | <b>msi</b>        | HFA17003           | -2.6               |
|                   |                  |                   | FBgn0028991             | <b>CG4055</b>     | HFA06863           | -3.7               |
|                   |                  |                   | FBgn0035720             | <b>CG10077</b>    | HFA09691           | 3.1                |
|                   |                  |                   | FBgn0000008             | <b>CG14169</b>    | HFA10170           | -2.2               |
|                   |                  |                   | FBgn0086902             | <b>kis</b>        | BKN20986           | 2.3                |
| HFA09691          | <b>CG10077</b>   | 2.6               | FBgn0003261             | <b>Rm62</b>       | HFA12365           | 3.8                |
| BKN41059          | <b>CG40121</b>   | -3.6              | FBgn0043903             | <b>dome</b>       | BKN25660           | -7.9               |
|                   |                  |                   | FBgn0000259             | <b>CkIibeta</b>   | HFA20230           | -2.2               |
|                   |                  |                   | FBgn0004656             | <b>fs(1)h</b>     | HFA18778           | -4.8               |
|                   |                  |                   | FBgn0043903             | <b>dome</b>       | HFA19583           | -13.5              |
|                   |                  |                   | FBgn0010412             | <b>RpS19</b>      | HFA20281           | -7.0               |

grey labelling of off-targets, indicates that their knockdown resulted in a significant Z-score in the same direction as the original intended gene
